# Supplementary material
Source: ML conference proceedings conference paper supplement (https://proceedings.neurips.cc/paper_files/paper/2012/hash/9bf31c7ff062936a96d3c8bd1f8f2ff3-Abstract.html)
Supplement: Supplementary file [file 9bf31c7ff062936a96d3c8bd1f8f2ff3-Supplemental.zip]

---

# Supplementary Material to Learning from Distributions via Support Measure Machines

---

**Krikamol Muandet**

MPI for Intelligent Systems, Tübingen  
krikamol@tuebingen.mpg.de

**Kenji Fukumizu**

The Institute of Statistical Mathematics, Tokyo  
fukumizu@ism.ac.jp

**Francesco Dinuzzo**

MPI for Intelligent Systems, Tübingen  
fdinuzzo@tuebingen.mpg.de

**Bernhard Schölkopf**

MPI for Intelligent Systems, Tübingen  
bs@tuebingen.mpg.de

## 1 Proof of Theorem 1

**Theorem 1.** *Given training examples  $(\mathbb{P}_i, y_i) \in \mathcal{P} \times \mathbb{R}$ ,  $i = 1, \dots, m$ , a strictly monotonically increasing function  $\Omega : [0, +\infty) \rightarrow \mathbb{R}$ , and a loss function  $\ell : (\mathcal{P} \times \mathbb{R}^2)^m \rightarrow \mathbb{R} \cup \{+\infty\}$ , any  $f \in \mathcal{H}$  minimizing the regularized risk functional*

$$\ell(\mathbb{P}_1, y_1, \mathbb{E}_{\mathbb{P}_1}[f], \dots, \mathbb{P}_m, y_m, \mathbb{E}_{\mathbb{P}_m}[f]) + \Omega(\|f\|_{\mathcal{H}}) \quad (1)$$

*admits a representation of the form  $f = \sum_{i=1}^m \alpha_i \mu_{\mathbb{P}_i}$  for some  $\alpha_i \in \mathbb{R}$ ,  $i = 1, \dots, m$ .*

*Proof.* By virtue of Proposition 2 in [1], the linear functional  $\mathbb{E}_{\mathbb{P}}[\cdot]$  are bounded for all  $\mathbb{P} \in \mathcal{P}$ . Then, given  $\mathbb{P}_1, \mathbb{P}_2, \dots, \mathbb{P}_m$ , any  $f \in \mathcal{H}$  can be decomposed as

$$f = f_{\mu} + f^{\perp}$$

where  $f_{\mu} \in \mathcal{H}$  lives in the span of  $\mu_{\mathbb{P}_i}$ , i.e.,  $f_{\mu} = \sum_{i=1}^m \alpha_i \mu_{\mathbb{P}_i}$  and  $f^{\perp} \in \mathcal{H}$  satisfying, for all  $j$ ,  $\langle f^{\perp}, \mu_{\mathbb{P}_j} \rangle = 0$ . Hence, for all  $j$ , we have

$$\mathbb{E}_{\mathbb{P}_j}[f] = \mathbb{E}_{\mathbb{P}_j}[f_{\mu} + f^{\perp}] = \langle f_{\mu} + f^{\perp}, \mu_{\mathbb{P}_j} \rangle = \langle f_{\mu}, \mu_{\mathbb{P}_j} \rangle + \langle f^{\perp}, \mu_{\mathbb{P}_j} \rangle = \langle f_{\mu}, \mu_{\mathbb{P}_j} \rangle$$

which is independent of  $f^{\perp}$ . As a result, the loss functional  $\ell$  in (1) does not depend on  $f^{\perp}$ . For the regularization functional  $\Omega$ , since  $f^{\perp}$  is orthogonal to  $\sum_{i=1}^m \alpha_i \mu_{\mathbb{P}_i}$  and  $\Omega$  is strictly monotonically increasing, we have

$$\Omega(\|f\|) = \Omega(\|f_{\mu} + f^{\perp}\|) = \Omega(\sqrt{\|f_{\mu}\|^2 + \|f^{\perp}\|^2}) \geq \Omega(\|f_{\mu}\|)$$

with equality if and only if  $f^{\perp} = 0$  and thus  $f = f_{\mu}$ . Consequently, any minimizer must take the form  $f = \sum_{i=1}^m \alpha_i \mu_{\mathbb{P}_i} = \sum_{i=1}^m \alpha_i \mathbb{E}_{\mathbb{P}_i}[k(x, \cdot)]$ . ■

## 2 Proof of Theorem 3

**Theorem 3.** *Given an arbitrary probability distribution  $\mathbb{P}$  with variance  $\sigma^2$ , a Lipschitz continuous function  $f : \mathbb{R} \rightarrow \mathbb{R}$  with constant  $C_f$ , an arbitrary loss function  $\ell : \mathbb{R} \times \mathbb{R} \rightarrow \mathbb{R}$  that is Lipschitz continuous in the second argument with constant  $C_{\ell}$ , it follows that*

$$|\mathbb{E}_{x \sim \mathbb{P}}[\ell(y, f(x))] - \ell(y, \mathbb{E}_{x \sim \mathbb{P}}[f(x)])| \leq 2C_{\ell}C_f\sigma$$

for any  $y \in \mathbb{R}$ .

*Proof.* Assume that  $x$  is distributed according to  $\mathbb{P}$ . Let  $m_X$  be the mean of  $X$  in  $\mathbb{R}^d$ . Thus, we have

$$\begin{aligned} |\mathbb{E}_{\mathbb{P}}[\ell(y, f(x))] - \ell(y, \mathbb{E}_{\mathbb{P}}[f(x)])| &\leq \int |\ell(y, f(\tilde{x})) - \ell(y, \mathbb{E}_{\mathbb{P}}[f(x)])| d\mathbb{P}(\tilde{x}) \\ &\leq C_\ell \int |f(\tilde{x}) - \mathbb{E}_{\mathbb{P}}[f(x)]| d\mathbb{P}(\tilde{x}) \\ &\leq \underbrace{C_\ell \int |f(\tilde{x}) - f(m_X)| d\mathbb{P}(\tilde{x})}_A + \underbrace{C_\ell |f(m_X) - \mathbb{E}_{\mathbb{P}}[f(x)]|}_B. \end{aligned}$$

**Control of (A)** The first term is upper bounded by

$$C_\ell \int C_f \|\tilde{x} - m_X\| d\mathbb{P}(\tilde{x}) \leq C_\ell C_f \sigma, \quad (2)$$

where the last inequality is given by  $\mathbb{E}_{\mathbb{P}}[\|\tilde{x} - m_X\|] \leq \sqrt{\mathbb{E}_{\mathbb{P}}[\|\tilde{x} - m_X\|^2]} = \sigma$ .

**Control of (B)** Similarly, the second term is upper bounded by

$$C_\ell \left| \int f(m_X) - f(\tilde{x}) d\mathbb{P}(\tilde{x}) \right| \leq C_\ell \int C_f \|m_X - \tilde{x}\| d\mathbb{P}(\tilde{x}) \leq C_\ell C_f \sigma. \quad (3)$$

Combining (2) and (3) yields

$$|\mathbb{E}_{\mathbb{P}}[\ell(y, f(x))] - \ell(y, \mathbb{E}_{\mathbb{P}}[f(x)])| \leq 2C_\ell C_f \sigma,$$

thus completing the proof.  $\blacksquare$

### 3 Proof of Lemma 4

**Lemma 4.** Let  $k(x, z)$  be a bounded p.d. kernel on a measure space such that  $\iint k(x, z)^2 dx dz < \infty$ , and  $g(x, \tilde{x})$  be a square integrable function such that  $\int g(x, \tilde{x}) d\tilde{x} < \infty$  for all  $x$ . Given a sample  $\{(\mathbb{P}_i, y_i)\}_{i=1}^m$  where each  $\mathbb{P}_i$  is assumed to have a density given by  $g(x_i, x)$ , the linear SMM is equivalent to the SVM on the training sample  $\{(x_i, y_i)\}_{i=1}^m$  with kernel  $K_g(x, z) = \iint k(\tilde{x}, \tilde{z})g(x, \tilde{x})g(z, \tilde{z}) d\tilde{x} d\tilde{z}$ .

*Proof.* For a training sample  $\{(x_i, y_i)\}_{i=1}^m$ , the SVM with kernel  $K_g$  minimizes

$$\ell(\{x_i, y_i, f(x_i) + b\}_{i=1}^m) + \lambda \|f\|_{\mathcal{H}_{K_g}}^2.$$

By the representer theorem,  $f(x) = \sum_{i=1}^m \alpha_i K_g(x, x_i)$  with some  $\alpha_i \in \mathbb{R}$ , hence this is equivalent to

$$\ell(\{x_i, y_i, \sum_{j=1}^m \alpha_j K_g(x_i, x_j) + b\}_{i=1}^m) + \lambda \sum_{i,j=1}^m \alpha_i \alpha_j K_g(x_i, x_j).$$

Next, consider the kernel mean of the probability measure  $g(x_i, x)dx$  given by  $\mu_i = \int k(\cdot, \tilde{x})g(x_i, \tilde{x}) d\tilde{x}$  and note that  $\langle \mu_i, f \rangle_{\mathcal{H}_k} = \int f(\tilde{x})g(x_i, \tilde{x}) d\tilde{x}$  for any  $f \in \mathcal{H}_k$ . The linear SMM with loss  $\ell$  and kernel  $k$  minimizes

$$\ell(\{\mathbb{P}_i, y_i, \langle \mu_i, f \rangle_{\mathcal{H}_k} + b\}_{i=1}^m) + \lambda \|f\|_{\mathcal{H}_k}^2.$$

By Theorem 1, each minimizer  $f$  admits a representation of the form

$$f = \sum_{j=1}^m \alpha_j \mu_j = \sum_{j=1}^m \alpha_j \int k(\cdot, \tilde{x})g(x_j, \tilde{x}) d\tilde{x}.$$

Thus, for this  $f$  we have

$$\langle \mu_i, f \rangle_{\mathcal{H}_k} = \sum_{j=1}^m \alpha_j \iint k(\tilde{z}, \tilde{x})g(x_i, \tilde{x})g(x_j, \tilde{z}) d\tilde{x} d\tilde{z} = \sum_{j=1}^m \alpha_j K_g(x_i, x_j)$$

and

$$\|f\|_{\mathcal{H}_k}^2 = \sum_{i,j=1}^m \alpha_i \alpha_j \langle \mu_i, \mu_j \rangle = \sum_{i,j=1}^m \alpha_i \alpha_j K_g(x_i, x_j)$$

, as above. This completes the proof.  $\blacksquare$

## References

- [1] B. K. Sriperumbudur, A. Gretton, K. Fukumizu, B. Schölkopf, and Gert R. G. Lanckriet. Hilbert space embeddings and metrics on probability measures. *Journal of Machine Learning Research*, 99:1517–1561, 2010.
